# Supplementary material for: Effects of bromine-containing counterion salts in directing the structures of medium-sized silver nanoclusters
Source: Royal Society of Chemistry journal article supplement (doi:10.1039/d3nr05464k), 2023-12-20
Supplement: d3nr05464k1.pdf [file d3nr05464k1.pdf]

**Supplementary information**

**Effects of Bromine-Containing Counterion Salts in Directing the  
Structures of Medium-Sized Silver Nanoclusters†**

Haoqi Li, Xiao Wei, Xi Kang,\* Manzhou Zhu

Department of Chemistry and Centre for Atomic Engineering of Advanced Materials, Key Laboratory of Structure and Functional Regulation of Hybrid Materials of Ministry of Education, Institutes of Physical Science and Information Technology and Anhui Province Key Laboratory of Chemistry for Inorganic/Organic Hybrid Functionalized Materials, Anhui University, Hefei, Anhui 230601, China.

\*E-mails of corresponding authors: kangxi\_chem@ahu.edu.cn (X.K.)

*This PDF file includes:*

Experimental Methods

Figs. S1-S18

Tables S1-S3

## Experimental Methods

### Materials

All reagents were purchased from Sigma-Aldrich and used without further purification, including silver nitrate ( $\text{AgNO}_3$ , 99.9%, metal basis), 1-adamantane thiol ( $\text{C}_{10}\text{H}_{15}\text{SH}$ , HS-Adm, 95%), diphenyl-2-pyridylphosphine ( $\text{C}_{17}\text{H}_{14}\text{NP}$ , 98%), borane-tert-butylamine complex ( $\text{C}_4\text{H}_{14}\text{BN}$ , 97%), tetraphenylphosphonium bromide ( $\text{PPh}_4\text{Br}$ , 99%), tetraoctylammonium bromide ( $\text{C}_{32}\text{H}_{68}\text{BrN}$ , TOABr, 98%), methylene chloride ( $\text{CH}_2\text{Cl}_2$ , HPLC grade), methanol ( $\text{CH}_3\text{OH}$ , HPLC grade), and *n*-hexane (Hex, HPLC grade).

### Synthesis of $[\text{Ag}_{52}(\text{SR})_{30}\text{Br}_4\text{H}_{20}]^{2-}$ ( $\text{Ag}_{52}$ ) and $[\text{Ag}_{54}(\text{SR})_{30}\text{Br}_4\text{H}_{22}]^{2-}$ ( $\text{Ag}_{54}$ )

94mg of  $\text{AgNO}_3$  was dissolved in 5ml methanol, followed by the addition of a mixture consisting of 5ml methanol and 10ml ethanol. Stir the solution for 10 minutes, add 50mg of HS-Adm to achieve a green transparent solution. After an additional 10 minutes, upon adding 100mg diphenyl-2-pyridylphosphine, the solution starts to exhibit turbidity. Maintain stirring for another duration of ten minutes before sequentially introducing both the borane-tert-butylamine complex (100mg) and tetraphenylphosphonium bromide (50mg). Following a reaction time span of twelve hours, perform spin-evaporation under vacuum conditions and conduct two washes with methanol and *n*-hexane respectively to obtain  $\text{Ag}_{52}$  and  $\text{Ag}_{54}$  clusters. The yield is 45% based on the Ag element (calculated from the  $\text{AgNO}_3$ ).

### Synthesis of $[\text{Ag}_{58}(\text{SR})_{30}\text{Br}_4(\text{NO}_3)_2\text{H}_{22}]^{2+}$ ( $\text{Ag}_{58}$ )

The synthesis of  $[\text{Ag}_{58}(\text{SR})_{30}\text{Br}_4(\text{NO}_3)_2\text{H}_{22}]^{2+}$  was the same as that of  $[\text{Ag}_{52}(\text{SR})_{30}\text{Br}_4\text{H}_{20}]^{2-}$ , except that  $\text{PPh}_4\text{Br}$  was replaced by TOABr. The yield is 20% based on the Ag element (calculated from the  $\text{AgNO}_3$ ).

### Crystallization of $\text{Ag}_{52}$ and $\text{Ag}_{54}$ nanoclusters

After 12 h of reaction, the mixture was rotationally evaporated under vacuum. They were washed twice each with methanol and hexane. Single crystals of these nanoclusters were cultivated at room temperature by liquid diffusion of *n*-hexane into a  $\text{CH}_2\text{Cl}_2$  solution containing each nanocluster. After 14 days, yellow crystals were collected, and the structures of these nanoclusters were determined.

### Crystallization of the $\text{Ag}_{58}$ nanocluster

After 12 h of reaction, the mixture was rotationally evaporated under vacuum. They were washed twice each with methanol and hexane. Single crystals of the  $\text{Ag}_{58}$  nanocluster was cultivated at room temperature by liquid diffusion of *n*-hexane into a  $\text{CH}_2\text{Cl}_2$  solution containing each nanocluster. After 14 days, brown crystals were collected.

### X-ray crystallography

The data collection for single-crystal X-ray diffraction (SC-XRD) of all nanocluster crystal samples was carried out on Stoe Stadivari diffractometer under nitrogen flow, using graphite-monochromatized Cu  $K\alpha$  radiation ( $\lambda = 1.54186 \text{ \AA}$ ). Data reductions and absorption corrections were performed using the SAINT and SADABS programs, respectively. The structure was solved by direct methods and refined with full-matrix least squares on  $F^2$  using the SHELXTL software package. All non-hydrogen atoms were refined anisotropically, and all the hydrogen atoms were set in geometrically calculated positions and refined isotropically using a riding model. All crystal structures were treated with PLATON SQUEEZE, and the diffuse electron densities from these residual solvent molecules were removed. The CCDC number of the

$\text{Ag}_{52}(\text{SR})_{30}\text{Br}_4$  nanocluster is 2301182. The CCDC number of  $\text{Ag}_{54}(\text{SR})_{30}\text{Br}_4$  is 2301180. The CCDC number of  $\text{Ag}_{58}(\text{SR})_{30}\text{Br}_4(\text{NO}_3)_2$  is 2301183.

### Measurements

All UV-vis absorption spectra of the nanoclusters dissolved in  $\text{CH}_2\text{Cl}_2$  were recorded using an Agilent 8453 diode array spectrometer.

Electrospray ionization mass spectrometry (ESI-MS) measurements were performed by Waters XEVO G2-XS QToF mass spectrometer. The sample was directly infused into the chamber at 5  $\mu\text{L}/\text{min}$ . For preparing the ESI samples, nanoclusters were dissolved in  $\text{CH}_2\text{Cl}_2$  (1 mg/mL) and diluted ( $v/v = 1:1$ ) by  $\text{CH}_3\text{OH}$ .

Photoluminescence (PL) spectra were measured on an FL-4500 spectrofluorometer with the same optical density (OD) of  $\sim 0.1$ .

X-ray photoelectron spectroscopy (XPS) measurements were performed on a Thermo ESCALAB 250 configured with a monochromatized Al  $K\alpha$  (1486.8 eV) 150 W X-ray source, a 0.5 mm circular spot size, a flood gun to counter charging effects, and an analysis chamber base pressure lower than  $1 \times 10^{-9}$  mbar.

Nuclear magnetic resonance (NMR) spectra are acquired using a Bruker 600 Avance III spectrometer equipped with a Bruker BBO multinuclear probe (BrukerBioSpin).

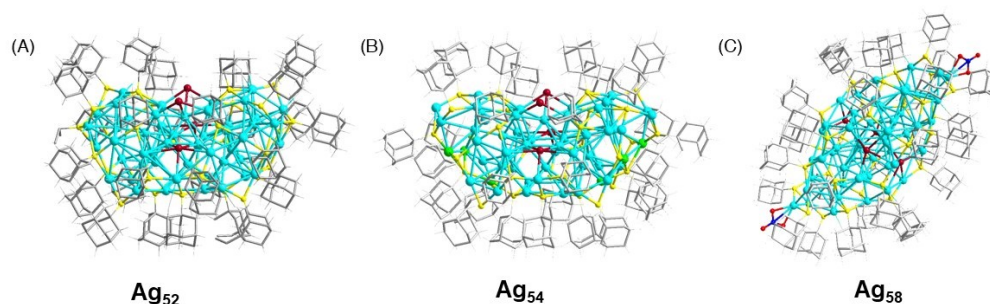

**Figure S1.** Crystal structures of nanoclusters in this work. (A) Crystal structure of the  $\text{Ag}_{52}$  nanocluster. (B) Crystal structure of the  $\text{Ag}_{54}$  nanocluster. (C) Crystal structure of the  $\text{Ag}_{58}$  nanocluster. Color labels: Light blue/green = Ag; yellow = S; brown = Br; blue = N; red = O; grey = C; white = H.

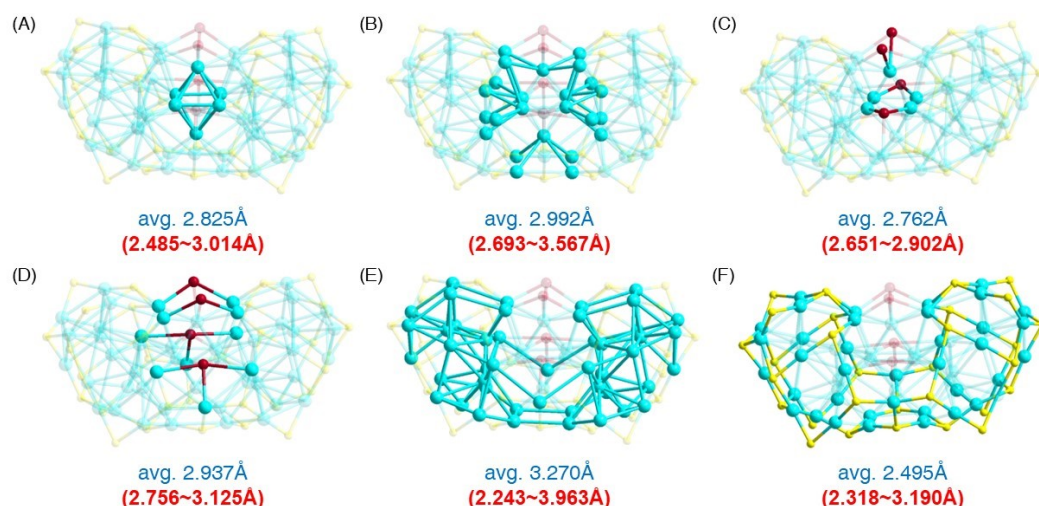

**Figure S2.** Comparison of the corresponding bond lengths in the  $\text{Ag}_{52}$  nanocluster. (A) Comparison of the length of Ag(octahedral surface)---Ag(octahedral surface) bonds. (B) Comparison of the length of Ag(octahedral surface)---Ag(motif) bonds. (C) Comparison of the length of Ag(octahedral surface)---Br bonds. (D) Comparison of the length of Br---Ag(motif) bonds. (E) Comparison of the length of Ag(motif)---Ag(motif) bonds. (F) Comparison of the length of Ag(motif)---S(motif) bonds. The compare bonds were highlighted for clarity.

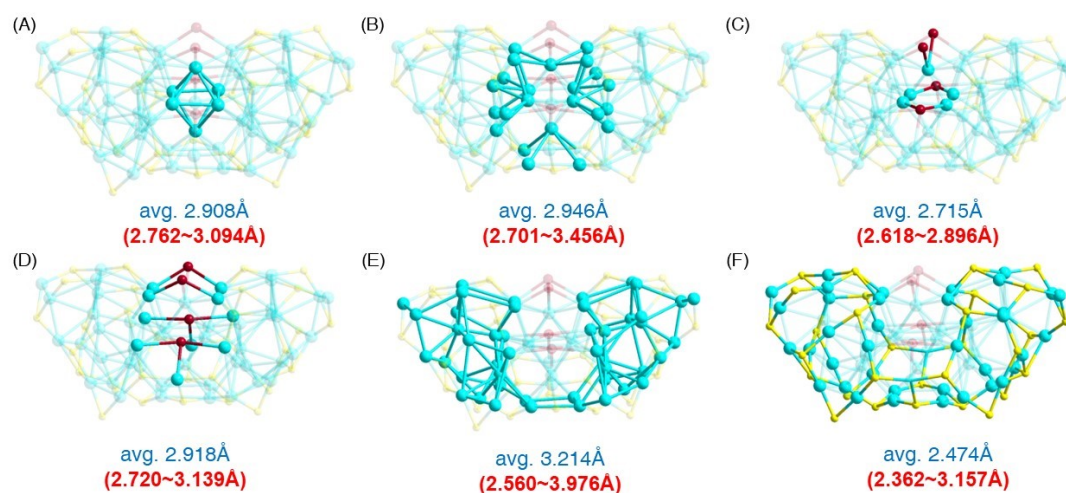

**Figure S3.** Comparison of the corresponding bond lengths in the  $\text{Ag}_{54}$  nanocluster. (A) Comparison of the length of Ag(octahedral surface)---Ag(octahedral surface) bonds. (B) Comparison of the length of Ag(octahedral surface)---Ag(motif) bonds. (C) Comparison of the length of Ag(octahedral surface)---Br bonds. (D) Comparison of the length of Br---Ag(motif) bonds. (E) Comparison of the length of Ag(motif)---Ag(motif) bonds. (F) Comparison of the length of Ag(motif)---S(motif) bonds. The compare bonds were highlighted for clarity.

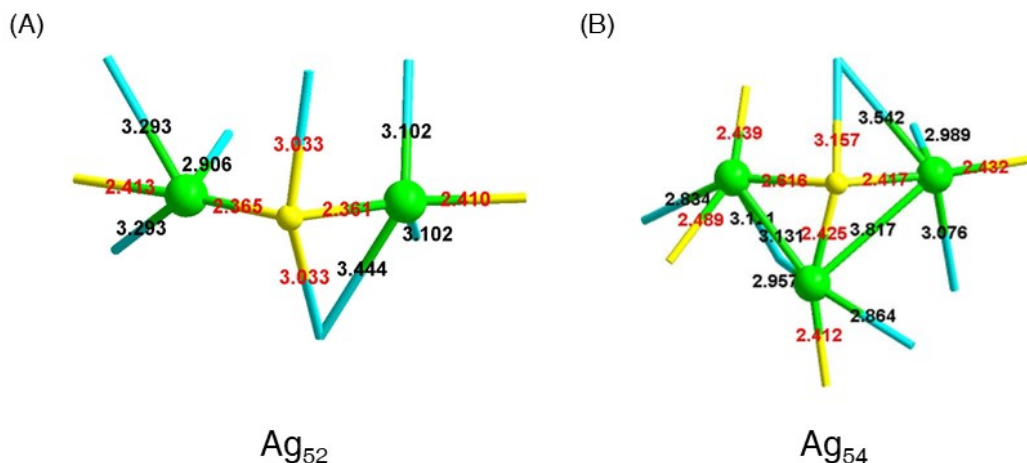

**Figure S4.** Comparison of bond lengths in  $Ag_2(SR)_1$  motif in  $Ag_{52}$  clusters and  $Ag_3(SR)_1$  motif in  $Ag_{54}$  clusters. Among them, the red font is the Ag-S bond length, and the black font is the Ag-Ag bond length. Color labels: green = Ag; yellow = S. All C and H atoms were omitted for clarity.

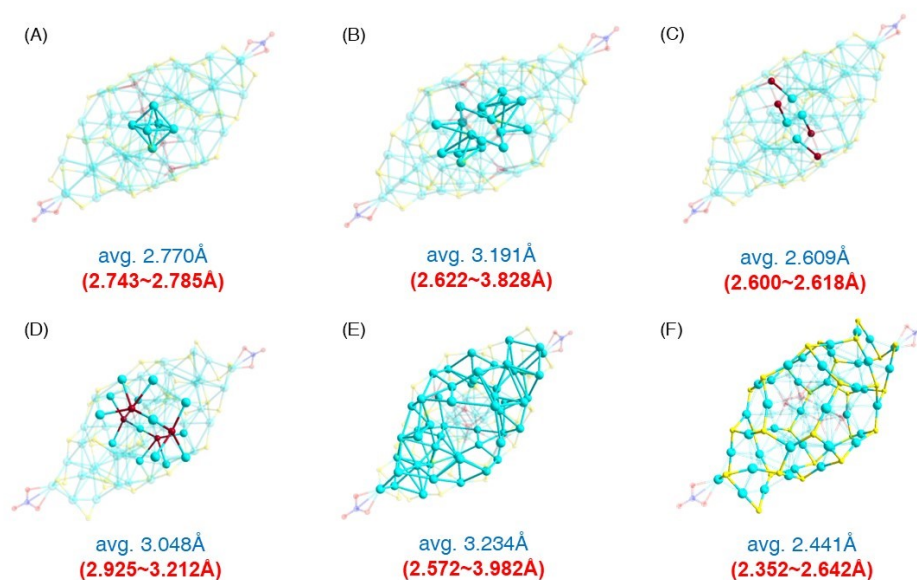

**Figure S5.** Comparison of the corresponding bond lengths in the  $Ag_{58}$  nanocluster. (A) Comparison of the length of Ag(octahedral surface)---Ag(octahedral surface) bonds. (B) Comparison of the length of Ag(octahedral surface)---Ag(motif) bonds. (C) Comparison of the length of Ag(octahedral surface)---Br bonds. (D) Comparison of the length of Br---Ag(motif) bonds. (E) Comparison of the length of Ag(motif)---Ag(motif) bonds. (F) Comparison of the length of Ag(motif)---S(motif) bonds. The compare bonds were highlighted for clarity.

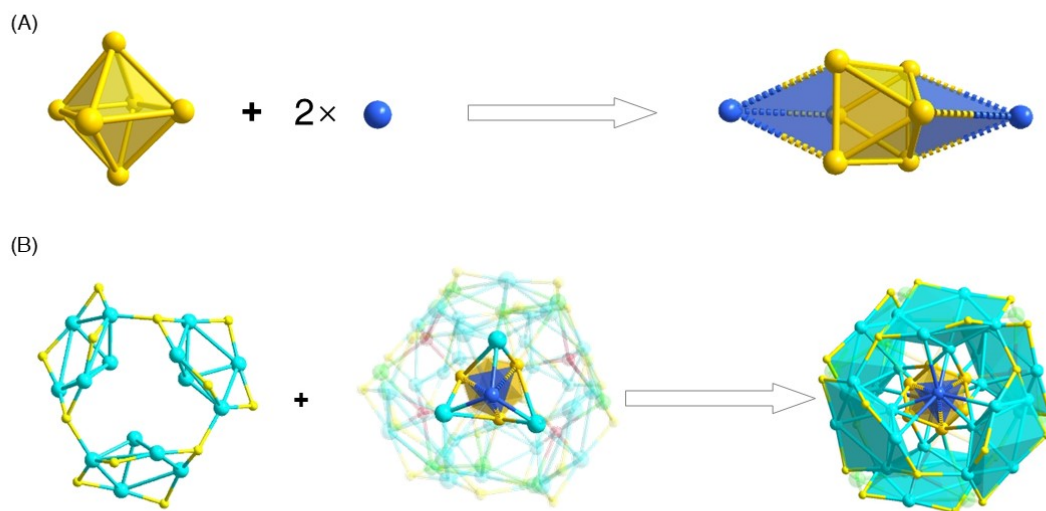

**Figure S6.** The structure of  $\text{Ag}_8$  unit and  $\text{Ag}_{46}$  unit is formed. (A) At both ends of the  $\text{Ag}_6$  core, two polar Ag atoms (marked in blue) were symmetrically connected to two  $\text{Ag}_3$  surfaces in the  $\text{Ag}_6$  octahedron, forming two  $\text{Ag}_4$  tetrahedra and constituting the  $\text{Ag}_8$  structure. (B) The three exposed  $\text{Ag}_3$  surfaces (blue surfaces) of the two  $\text{Ag}_4$  tetrahedra were connected to an  $\text{Ag}_5(\text{SR})_4$  motif, forming the  $\text{Ag}_{46}(\text{SR})_{24}\text{Br}_4$  unit. Color labels: gold/blue/light blue = Ag; yellow = S; brown = Br. All C and H atoms were omitted for clarity.

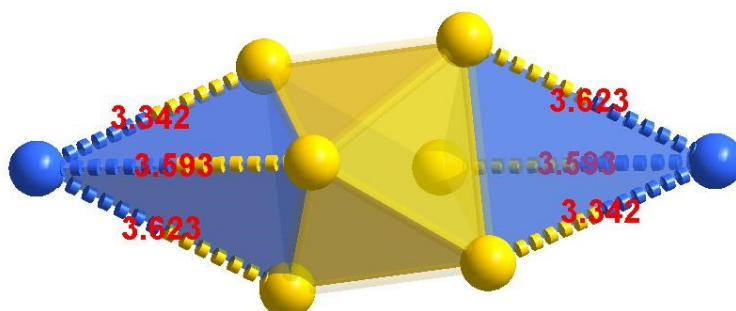

**Figure S7.** Bond length between polar Ag atom and  $\text{Ag}_6$  core. Color labels: gold/ blue = Ag.

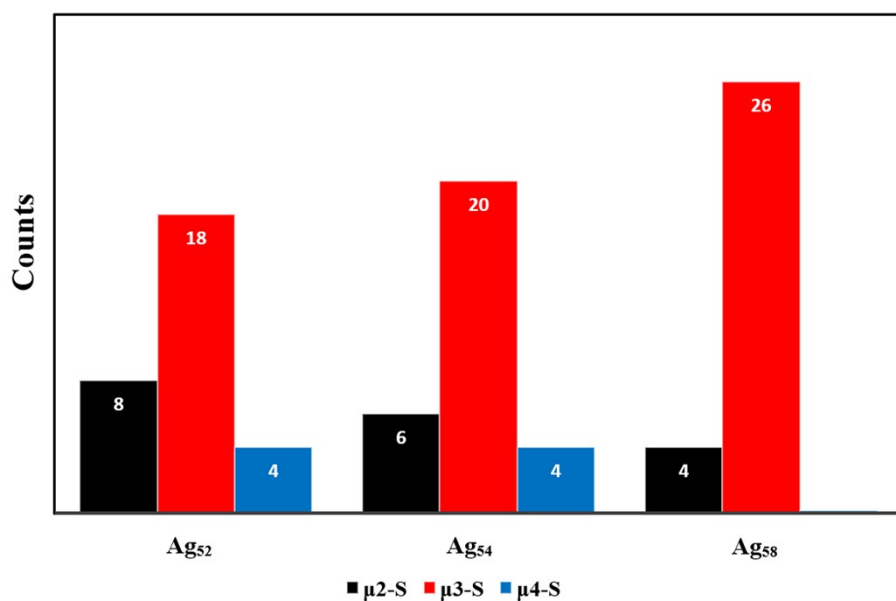

**Figure S8.** Comparison of the numbers of  $\mu_2$ -S,  $\mu_3$ -S and  $\mu_4$ -S in Ag<sub>52</sub>, Ag<sub>54</sub>, and Ag<sub>58</sub> nanoclusters. The number of  $\mu_2$ -S was decreased from Ag<sub>52</sub> to Ag<sub>54</sub> and Ag<sub>58</sub>. The number of  $\mu_3$ -S was increased from Ag<sub>52</sub> to Ag<sub>54</sub> and Ag<sub>58</sub>. It is worth noting that there are only  $\mu_2$ -S and  $\mu_3$ -S in Ag<sub>58</sub>.

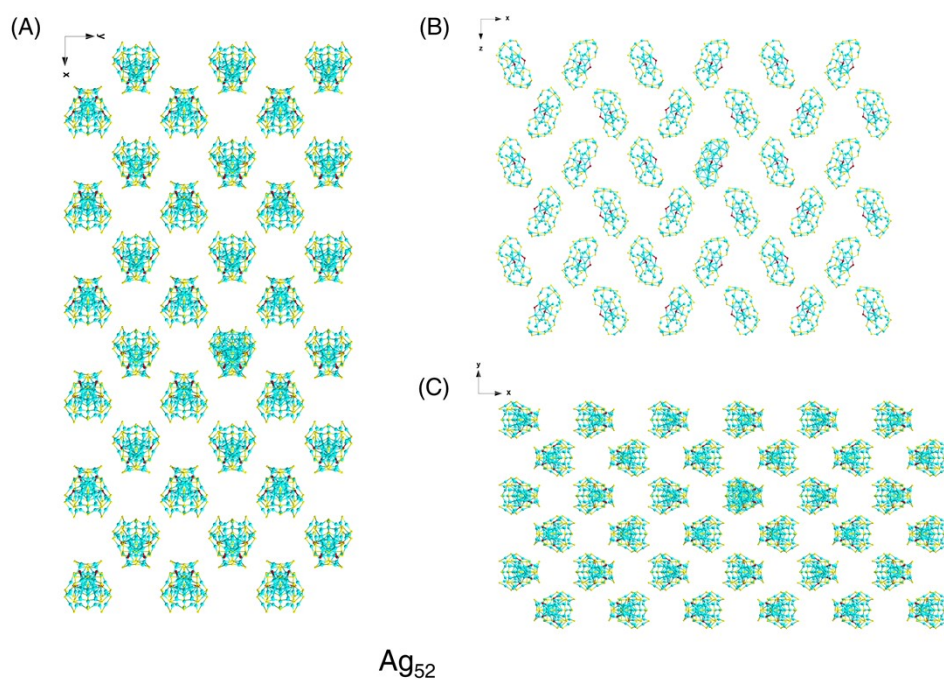

**Figure S9.** Packing of Ag<sub>52</sub> nanoclusters in the crystal lattice: view from the x axis (A), y axis (B) and z axis (C). Color labels: Light blue/green = Ag; yellow = S; brown = Br. All C and H atoms were omitted for clarity.

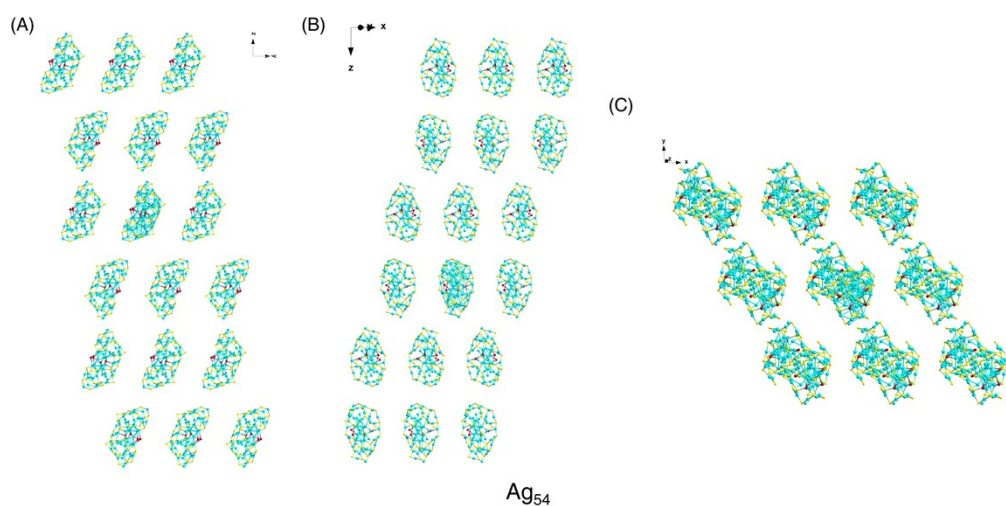

**Figure S10.** Packing of  $Ag_{54}$  nanoclusters in the crystal lattice: view from the x axis (A), y axis (B) and z axis (C). Color labels: Light blue/green = Ag; yellow = S; brown = Br. All C and H atoms were omitted for clarity.

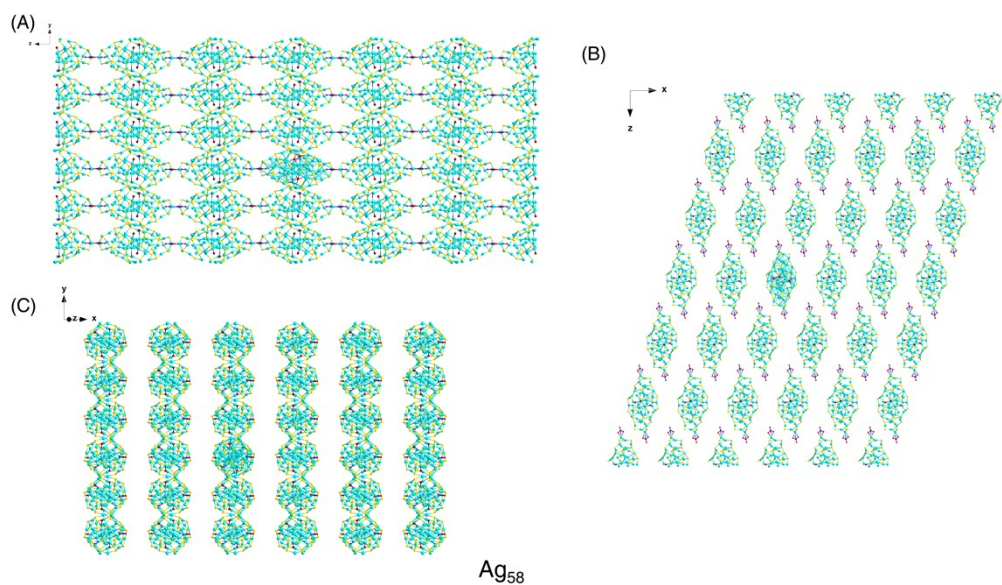

**Figure S11.** Packing of  $Ag_{58}$  nanoclusters in the crystal lattice: view from the x axis (A), y axis (B) and z axis (C). Color labels: Light blue/green = Ag; yellow = S; brown = Br; blue = N; red = O. All C and H atoms were omitted for clarity.



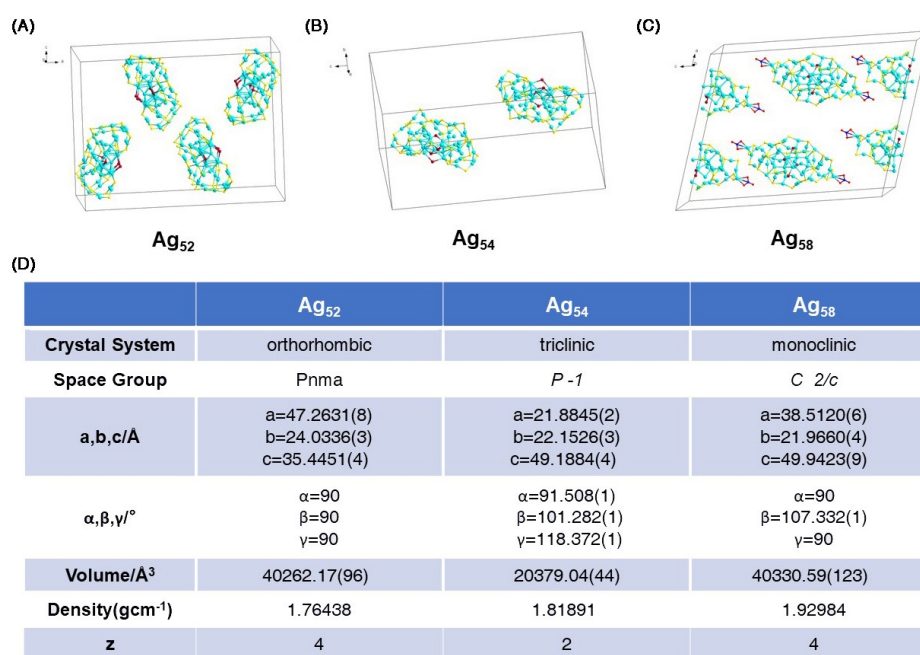

**Figure S12.** Crystal lattices of (A)  $Ag_{52}$  (B)  $Ag_{54}$  and (C)  $Ag_{58}$  nanoclusters. (D) Comparison of the crystalline unit cell parameters of  $Ag_{52}$ ,  $Ag_{54}$  and  $Ag_{58}$  nanoclusters. Color labels: Light blue/green = Ag; yellow = S; brown = Br; blue = N; red = O. All C and H atoms were omitted for clarity.

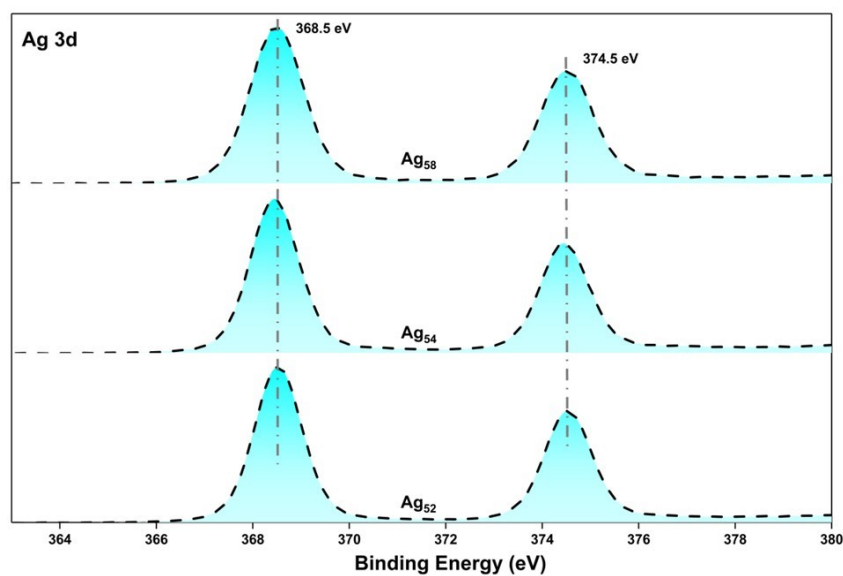

**Figure S13.** Comparison of the Ag 3d XPS signals of  $Ag_{52}$ ,  $Ag_{54}$ ,  $Ag_{58}$  nanoclusters. By comparison, the Ag 3d bands of  $Ag_{52}$ ,  $Ag_{54}$ ,  $Ag_{58}$  nanoclusters are all located at 368.5 and 374.5 eV.

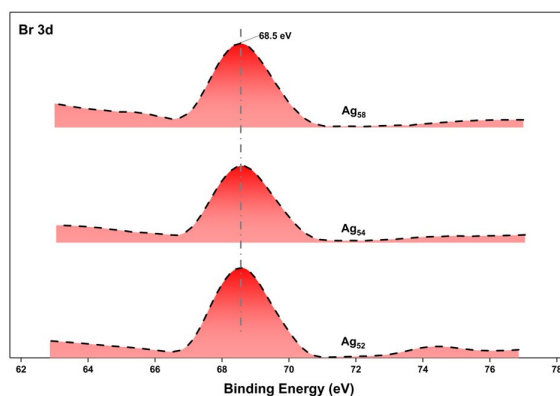

**Figure S14.** Comparison of the Br 3d XPS signals of  $\text{Ag}_{52}$ ,  $\text{Ag}_{54}$ ,  $\text{Ag}_{58}$  nanoclusters. By comparison, the Br 3d bands of  $\text{Ag}_{52}$ ,  $\text{Ag}_{54}$ ,  $\text{Ag}_{58}$  nanoclusters are all located at 68.5 eV.

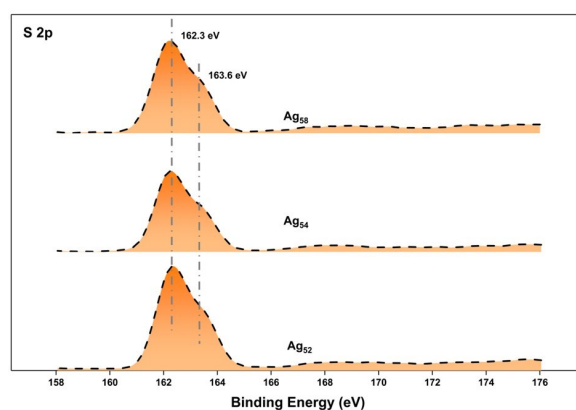

**Figure S15.** Comparison of the S 2p XPS signals of  $\text{Ag}_{52}$ ,  $\text{Ag}_{54}$ ,  $\text{Ag}_{58}$  nanoclusters. By comparison, the S 2p bands of  $\text{Ag}_{52}$ ,  $\text{Ag}_{54}$ ,  $\text{Ag}_{58}$  nanoclusters are all located at 162.3 and 163.6 eV.

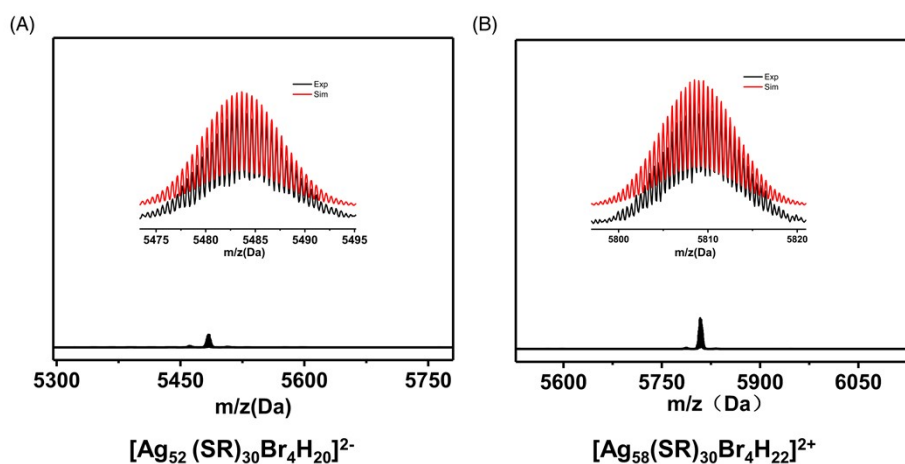

**Figure S16.** ESI-MS results of (A)  $[\text{Ag}_{52}(\text{SR})_{30}\text{Br}_4\text{H}_{20}]^{2-}$  and (B)  $[\text{Ag}_{58}(\text{SR})_{30}\text{Br}_4\text{H}_{22}]^{2+}$ . Insets in (A,B): experimental (in black) and simulated (in red) isotope patterns of each nanocluster. The nominal electron counts of both nanoclusters were determined as 0e, i.e.,  $52(\text{Ag}) - 30(\text{SR}) - 4(\text{Br}) - 20(\text{H}) + 2(\text{charge}) = 0\text{e}$  for  $[\text{Ag}_{52}(\text{SR})_{30}\text{Br}_4\text{H}_{20}]^{2-}$  and  $58(\text{Ag}) - 30(\text{SR}) - 4(\text{Br}) - 22(\text{H}) - 2(\text{charge}) = 0\text{e}$  for  $[\text{Ag}_{58}(\text{SR})_{30}\text{Br}_4\text{H}_{22}]^{2+}$ .

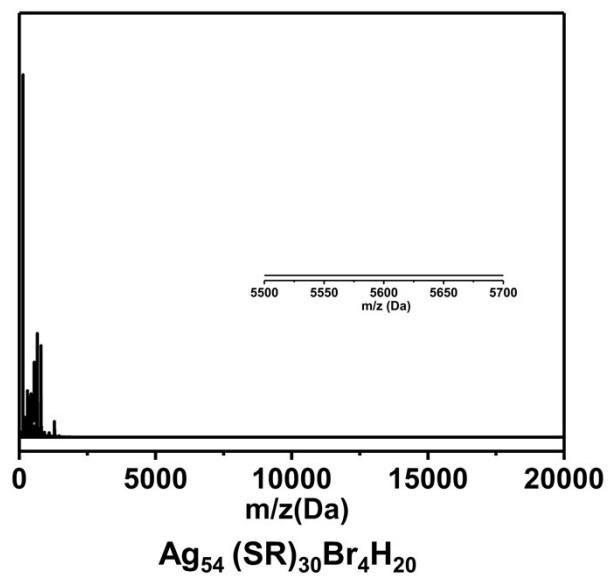

**Figure S17.** ESI-MS result of the  $\text{Ag}_{54}$  nanocluster in the negative mode.

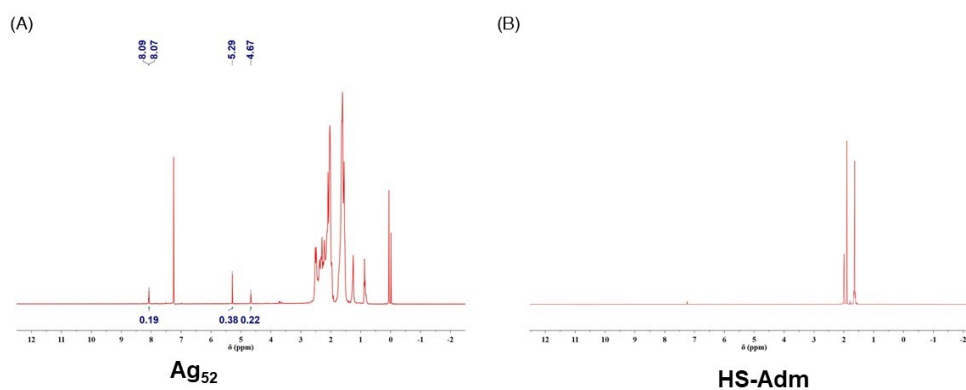

**Figure S18.**  $^1\text{H}$  NMR spectra of (A) the  $\text{Ag}_{52}$  cluster and (B) the HS-Adm ligand.

**Table S1.** Crystal data and structure refinement for the Ag<sub>52</sub> nanocluster. The CCDC number of the Ag<sub>52</sub> nanocluster is 2301182.

|                                             |                                                                                    |
|---------------------------------------------|------------------------------------------------------------------------------------|
| Molecular formula                           | C <sub>284</sub> H <sub>391</sub> Ag <sub>52</sub> Br <sub>4</sub> S <sub>30</sub> |
| Crystal system                              | orthorhombic                                                                       |
| Space group                                 | Pnma                                                                               |
| a/Å                                         | 47.2631(8)                                                                         |
| b/Å                                         | 24.0336(3)                                                                         |
| c/Å                                         | 35.4451(4)                                                                         |
| α/°                                         | 90                                                                                 |
| β/°                                         | 90                                                                                 |
| γ/°                                         | 90                                                                                 |
| Volume/Å <sup>3</sup>                       | 40262.2(10)                                                                        |
| Z                                           | 4                                                                                  |
| ρ <sub>calc</sub> /g/cm <sup>3</sup>        | 1.764                                                                              |
| μ/mm <sup>-1</sup>                          | 21.941                                                                             |
| F(000)                                      | 20636.0                                                                            |
| Radiation                                   | CuKα (λ = 1.54178)                                                                 |
| Index ranges                                | -42 ≤ h ≤ 53, -26 ≤ k ≤ 22, -31 ≤ l ≤ 39                                           |
| θ range (°)                                 | 6.472 -119.998                                                                     |
| Measured reflections and unique reflections | 65629/29539 [R <sub>int</sub> = 0.0770, R <sub>sigma</sub> = 0.1173]               |
| Goodness-of-fit on F <sup>2</sup>           | 1.096                                                                              |
| Largest diff. peak/hole / e Å <sup>-3</sup> | 4.85/-4.04                                                                         |
| Final R indexes [I >= 2σ (I)]               | R <sub>1</sub> = 0.1167, wR <sub>2</sub> = 0.2971                                  |
| Final R indexes [all data]                  | R <sub>1</sub> = 0.1502, wR <sub>2</sub> = 0.3220                                  |

**Table S2.** Crystal data and structure refinement for the Ag<sub>54</sub> nanocluster. The CCDC number of the Ag<sub>54</sub> nanocluster is 2301180.

|                                             |                                                                                    |
|---------------------------------------------|------------------------------------------------------------------------------------|
| Molecular formula                           | C <sub>300</sub> H <sub>449</sub> Ag <sub>54</sub> Br <sub>4</sub> S <sub>30</sub> |
| Crystal system                              | triclinic                                                                          |
| Space group                                 | P-1                                                                                |
| a/Å                                         | 21.8845(2)                                                                         |
| b/Å                                         | 22.1526(3)                                                                         |
| c/Å                                         | 49.1884(4)                                                                         |
| α/°                                         | 91.5080(10)                                                                        |
| β/°                                         | 101.2820(10)                                                                       |
| γ/°                                         | 118.3720(10)                                                                       |
| Volume/Å <sup>3</sup>                       | 20379.0(4)                                                                         |
| Z                                           | 2                                                                                  |
| ρ <sub>calc</sub> /cm <sup>3</sup>          | 1.819                                                                              |
| μ/mm <sup>-1</sup>                          | 22.438                                                                             |
| F(000)                                      | 10814.0                                                                            |
| Radiation                                   | CuKα (λ = 1.54186)                                                                 |
| Index ranges                                | -42 ≤ h ≤ 53, -26 ≤ k ≤ 22, -31 ≤ l ≤ 39                                           |
| θ range (°)                                 | 7.988 - 124.998                                                                    |
| Measured reflections and unique reflections | 168471/63506 [R <sub>int</sub> = 0.0483, R <sub>sigma</sub> = 0.0489]              |
| Goodness-of-fit on F <sup>2</sup>           | 1.028                                                                              |
| Largest diff. peak/hole / e Å <sup>-3</sup> | 4.09/-4.44                                                                         |
| Final R indexes [I >= 2σ (I)]               | R <sub>1</sub> = 0.0888, wR <sub>2</sub> = 0.2453                                  |
| Final R indexes [all data]                  | R <sub>1</sub> = 0.1006, wR <sub>2</sub> = 0.2576                                  |

**Table S3.** Crystal data and structure refinement for the Ag<sub>58</sub> nanocluster. The CCDC number of the Ag<sub>5</sub> nanocluster is 2301183.

|                                             |                                                                                                                  |
|---------------------------------------------|------------------------------------------------------------------------------------------------------------------|
| Molecular formula                           | C <sub>300</sub> H <sub>446</sub> Ag <sub>58</sub> Br <sub>4</sub> N <sub>2</sub> O <sub>6</sub> S <sub>30</sub> |
| Crystal system                              | monoclinic                                                                                                       |
| Space group                                 | C2/c                                                                                                             |
| a/Å                                         | 38.5120(6)                                                                                                       |
| b/Å                                         | 21.9660(4)                                                                                                       |
| c/Å                                         | 49.9423(9)                                                                                                       |
| α/°                                         | 90                                                                                                               |
| β/°                                         | 107.3320(10)                                                                                                     |
| γ/°                                         | 90                                                                                                               |
| Volume/Å <sup>3</sup>                       | 40330.6(12)                                                                                                      |
| Z                                           | 4                                                                                                                |
| ρ <sub>calc</sub> /cm <sup>3</sup>          | 1.929                                                                                                            |
| μ/mm <sup>-1</sup>                          | 24.213                                                                                                           |
| F(000)                                      | 22616.0                                                                                                          |
| Radiation                                   | CuKα (λ = 1.54186)                                                                                               |
| Index ranges                                | -44 ≤ h ≤ 24, -25 ≤ k ≤ 24, -57 ≤ l ≤ 56                                                                         |
| θ range (°)                                 | 12.152 -125                                                                                                      |
| Measured reflections and unique reflections | 89651/31112 [R <sub>int</sub> = 0.0639, R <sub>sigma</sub> = 0.0921]                                             |
| Goodness-of-fit on F <sup>2</sup>           | 0.986                                                                                                            |
| Largest diff. peak/hole / e Å <sup>-3</sup> | 3.11/-5.14                                                                                                       |
| Final R indexes [I >= 2σ (I)]               | R <sub>1</sub> = 0.0924, wR <sub>2</sub> = 0.2564                                                                |
| Final R indexes [all data]                  | R <sub>1</sub> = 0.1261, wR <sub>2</sub> = 0.2868                                                                |
